# Supplementary material for: Therapeutic potential of peptides from Ole e 1 in olive-pollen allergy
Source: PubMed Central journal article supplement (PMC6828773; doi:10.1038/s41598-019-52286-3), 2019-11-04
Supplement: 41598_2019_52286_MOESM1_ESM.pdf [file 41598_2019_52286_MOESM1_ESM.pdf]

## Supplementary material associated with:

### Title: Therapeutic potential of peptides from Ole e 1 in olive-pollen allergy

**Authors:** \*David Calzada<sup>1</sup>, \*Lucía Cremades-Jimeno<sup>1</sup>, María Ángeles de Pedro<sup>1</sup>, Selene Baos<sup>1</sup>, Manuel Rial<sup>2,3</sup>, Joaquín Sastre<sup>2,3</sup>, Joaquín Quiralte<sup>4</sup>, Fernando Florido<sup>5</sup>, Carlos Lahoz<sup>1,3</sup>, Blanca Cárdbaba<sup>1,3</sup>.

\*D. Calzada and L. Cremades-Jimeno have contributed equally to this article.

#### Institutions:

<sup>1</sup>Immunology Department, IIS-Fundación Jiménez Díaz, UAM, Madrid, Spain.

<sup>2</sup>Allergy Department, Fundación Jiménez Díaz, Madrid, Spain.

<sup>3</sup>CIBERES, CIBER of Respiratory Diseases, Spain.

<sup>4</sup>Allergy Department, Virgen del Rocío University Hospital, Seville, Spain.

<sup>5</sup>Allergy Department, San Cecilio University Hospital, Granada, Spain.

#### Correspondence:

Blanca Cárdbaba  
Immunology Department  
IIS-Fundación Jiménez Díaz  
Avda Reyes Católicos N° 2  
28040 Madrid  
Spain

**Telephone/FAX:** +34-91-5494445/ +34-91-5448246

**E-mail address:** [bcardaba@fjd.es](mailto:bcardaba@fjd.es)

**Supplementary Figure S1. Time-curve to determine optimal inhibition conditions of PBMCs response to olive pollen extract with immunomodulatory peptides.** PBMCs from nonallergic control (n=3) and olive-pollen-allergic subjects (n=3) were cultured with different combinations of peptides or/and olive-pollen extract (Olea) as is indicated in the figure, for 6 days, in order to determine: the reversion of the response or the inhibition response (after 24 or 48 hrs of pre-stimulation). Three different combinations of peptides were used: peptides 2 and 3 (immunoregulatory region); peptides 10, 12, and 13 (immunodominant region), and both groups of peptides. After 6 days of stimulation, proliferative response was measured. 100% proliferation was assigned to olive pollen extract (Olea) (dotted line). Results are shown in a box and whisker plot, with the mean, standard deviation, maximum and minimum values for the different groups: Upper graph, nonallergic control (n=3) and lower graph, olive-pollen-allergic subjects (n=3). \*Statistically significant comparison between the indicated combination and Olea condition ( $p < 0.05$ ). \*\*Statistically significant comparison between the indicated combination and Olea condition ( $p < 0.01$ ).

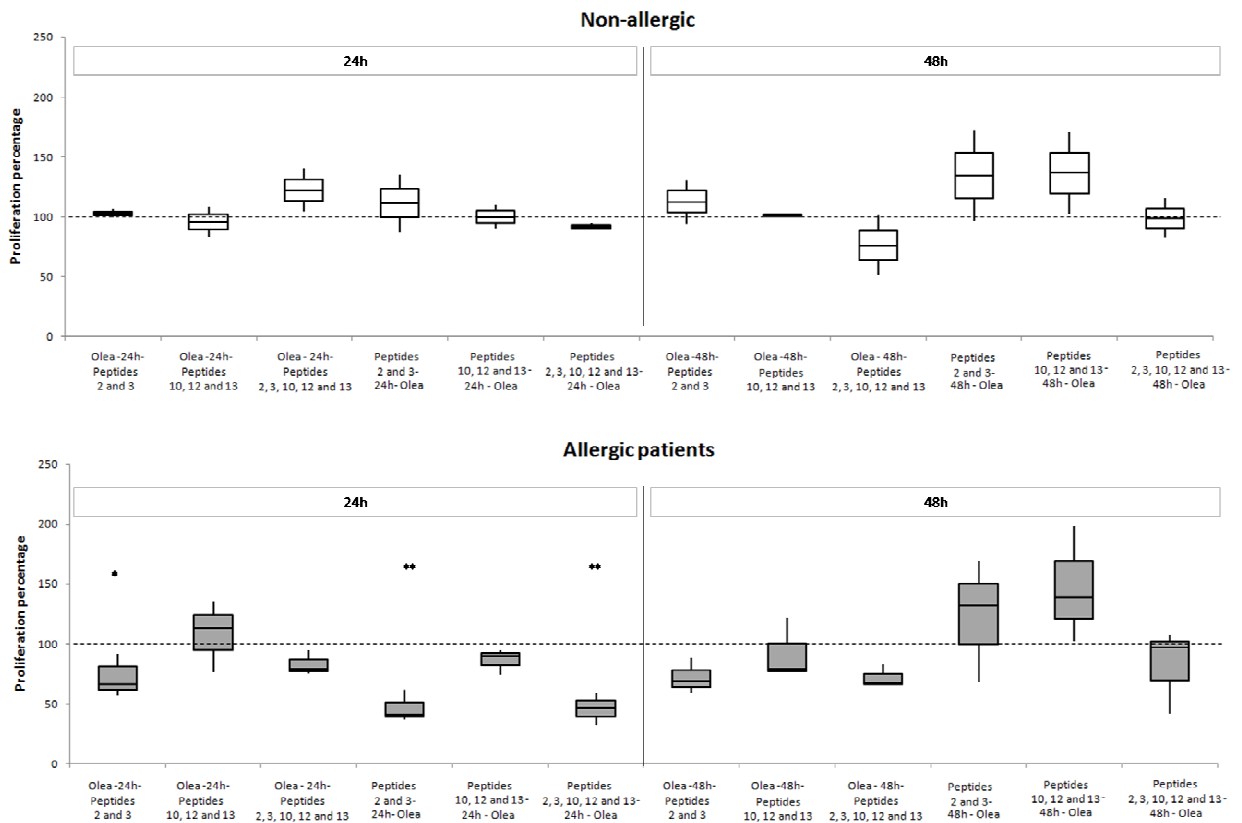

**Supplementary Table S1. Demographic and clinical characteristics of each individual studied.**

| Patient number | Age (years) | Sex    | Smoking | Clinical diagnosis |          |        | Skin prick test                                                                                                                                                                                                          | Total IgE levels (kU/l) | Specific IgE levels (Olive pollen) (kUA/l) | Specific IgE levels (Ole e 1) (kUA/l) |
|----------------|-------------|--------|---------|--------------------|----------|--------|--------------------------------------------------------------------------------------------------------------------------------------------------------------------------------------------------------------------------|-------------------------|--------------------------------------------|---------------------------------------|
|                |             |        |         | Allergy severity   | Rhinitis | Asthma |                                                                                                                                                                                                                          |                         |                                            |                                       |
| HC-1           | 49          | Female | Yes     | Control            | No       | No     | Negative                                                                                                                                                                                                                 | 374.00                  | 0.00                                       | NA                                    |
| HC-2           | 52          | Male   | No      | Control            | No       | No     | Negative                                                                                                                                                                                                                 | 147.00                  | 0.00                                       | NA                                    |
| HC-3           | 66          | Male   | Former  | Control            | No       | No     | Negative                                                                                                                                                                                                                 | 24.50                   | 0.00                                       | NA                                    |
| HC-4           | 41          | Female | No      | Control            | No       | No     | Negative                                                                                                                                                                                                                 | ND                      | ND                                         | NA                                    |
| HC-5           | 60          | Female | No      | Control            | No       | No     | Negative                                                                                                                                                                                                                 | 44.30                   | 0.00                                       | NA                                    |
| HC-6           | 55          | Female | No      | Control            | No       | No     | Negative                                                                                                                                                                                                                 | 14.50                   | 0.00                                       | NA                                    |
| HC-7           | 21          | Male   | No      | Control            | No       | No     | Negative                                                                                                                                                                                                                 | 31.50                   | 0.02                                       | NA                                    |
| HC-8           | 45          | Male   |         | Control            | No       | No     | Negative                                                                                                                                                                                                                 | 168.00                  | 0.34                                       | NA                                    |
| HC-9           | 22          | Female | No      | Control            | No       | No     | Negative                                                                                                                                                                                                                 | 77.90                   | 0.00                                       | NA                                    |
| HC-10          | 47          | Male   |         | Control            | No       | No     | Negative                                                                                                                                                                                                                 | 693.00                  | 0.07                                       | NA                                    |
| A-1            | 26          | Male   | Yes     | Mild               | Yes      | No     | <i>Olea europaea</i> , Hymenoptera, LTP allergy                                                                                                                                                                          | 168.00                  | 0.68                                       | 0.01                                  |
| A-2            | 29          | Male   | No      | Mild               | Yes      | No     | <i>Olea europaea</i>                                                                                                                                                                                                     | 789.00                  | 96.70                                      | 0.00                                  |
| A-3            | 52          | Female | No      | Moderate           | Yes      | No     | <i>Olea europaea</i> , Hymenoptera allergy                                                                                                                                                                               | 76.40                   | 1.37                                       | 0.56                                  |
| A-4            | 49          | Male   | Yes     | Mild               | Yes      | No     | <i>Phleum pratense</i> , <i>Olea europaea</i>                                                                                                                                                                            | 46.20                   | 0.04                                       | 0.02                                  |
| A-5            | 27          | Male   | Yes     | Mild               | Yes      | No     | <i>Phleum pratense</i> , <i>Olea europaea</i>                                                                                                                                                                            | 101.00                  | 1.41                                       | 0.56                                  |
| A-6            | 52          | Female | No      | Mild               | Yes      | No     | <i>Phleum pratense</i> , <i>Olea europaea</i>                                                                                                                                                                            | 512.00                  | 10.40                                      | 9.71                                  |
| A-7            |             |        |         |                    | Yes      | Yes    | <i>Olea europaea</i>                                                                                                                                                                                                     | 159.00                  | 33.50                                      | 13.20                                 |
| A-8            | 28          | Female | No      | Moderate           | Yes      | Yes    | <i>Olea europaea</i>                                                                                                                                                                                                     | 407.00                  | 40.00                                      | 26.90                                 |
| A-9            | 32          | Female | No      | Moderate           | Yes      | Yes    | <i>Olea europaea</i>                                                                                                                                                                                                     | 37.00                   | 1.54                                       | 1.17                                  |
| A-10           | 50          | Female | No      | Moderate           | Yes      | Yes    | <i>Olea europaea</i>                                                                                                                                                                                                     | 38.80                   | 7.51                                       | 4.74                                  |
| A-11           | 42          | Female | Former  | Moderate           | Yes      | Yes    | <i>Olea europaea</i>                                                                                                                                                                                                     | 159.00                  | 6.22                                       | 6.88                                  |
| A-12           | 30          | Female | No      | Moderate           | Yes      | Yes    | <i>Olea europaea</i> , <i>Salsola kali</i>                                                                                                                                                                               | 41.60                   | >100                                       | 0.08                                  |
| A-13           | 21          | Male   | No      | Moderate           | Yes      | Yes    | <i>Cupressus sempervirens</i> , <i>Olea europaea</i> , <i>Parietaria judaica</i> , <i>Phleum pratense</i> , <i>Salsola kali</i> ; urticaria to almond                                                                    | 14.30                   | 0.73                                       | 0.67                                  |
| A-14           | 23          | Female | No      | Mild               | Yes      | Yes    | <i>Cupressus sempervirens</i> , <i>Olea europaea</i> , <i>Phleum pratense</i> , <i>Platanus acerifolia</i>                                                                                                               | 112.00                  | 2.24                                       | 1.78                                  |
| A-15           | 16          |        | No      | Moderate           | Yes      | Yes    | <i>Alternaria alternata</i> , <i>Olea europaea</i> , <i>Platanus acerifolia</i> , <i>Salsola kali</i> , animals (cat, dog, horse)                                                                                        | 1676.00                 | 47.10                                      | 23.30                                 |
| A-16           | 18          | Female | No      | Moderate           | Yes      | Yes    | <i>Cupressus sempervirens</i> , <i>Olea europaea</i> , <i>Phleum pratense</i> , <i>Platanus acerifolia</i> , <i>Salsola kali</i>                                                                                         | 1066.00                 | 65.40                                      | 31.20                                 |
| A-17           | 29          | Male   | No      | Moderate           | Yes      | Yes    | <i>Alternaria alternata</i> , <i>Olea europaea</i> , <i>Phleum pratense</i>                                                                                                                                              | 2149.00                 | 1.19                                       | 0.03                                  |
| A-18           | 16          | Female | No      | Moderate           | Yes      | Yes    | <i>Cupressus sempervirens</i> , <i>Olea europaea</i> , <i>Phleum pratense</i> , <i>Platanus acerifolia</i> , <i>Salsola kali</i> , animals (cat, dog, horse), food allergy (egg); atopic dermatitis, urticaria to shrimp | 397.00                  | 10.50                                      | 8.67                                  |
| A-19           | 39          | Female | No      | Moderate           | Yes      | Yes    | <i>Alternaria alternata</i> , <i>Olea europaea</i> , <i>Phleum pratense</i> , animals (cat, dog); AINES intolerance                                                                                                      | 133.00                  | 1.37                                       | 1.42                                  |

HC: Healthy Controls Subjects. A: Olive-pollen-allergic patients. NA: not applicable. ND: not determined.
